# Supplementary material for: Bone marrow-derived mesenchymal stem cells enhance autophagy via PI3K/AKT signalling to reduce the severity of ischaemia/reperfusion-induced lung injury
Source: PubMed Central journal article supplement (PMC4594676; doi:10.1111/jcmm.12638), 2015-07-14
Supplement: jcmm0019-2341-sd2.pdf [file jcmm0019-2341-sd2.pdf]

Bone marrow-derived mesenchymal stem cells enhance autophagy via PI3K/AKT  
signalling to reduce the severity of ischemia/reperfusion-induced lung injury

Jing Li, M.D.<sup>1,2#</sup>; Jian Zhou, M.D., Ph.D.<sup>1,2#</sup>; Dan Zhang, M.D.<sup>1,2</sup>; Yuanlin Song, M.D.,  
Ph.D.<sup>1,2</sup>; Jun She, M.D., Ph.D.<sup>1,2\*</sup>; Chunxue Bai, M.D., Ph.D., FCCP<sup>1,2\*</sup>

Affiliation: 1 Department of Pulmonary Medicine, Zhongshan Hospital, Fudan  
University, Shanghai, China; 2 Shanghai Respiratory Research Institute, Shanghai,  
China.

\*Please address correspondence to:

Chunxue Bai, M.D., Ph.D.

Department of Pulmonary Medicine, Zhongshan Hospital, Fudan University,  
Shanghai, China; Shanghai Respiratory Research Institute, Shanghai, China;

No.180, Fenglin Road, Xuhui District, Shanghai, 200032, People's Republic of China

Tel: +86-21-64041990-3077

E-mail: [bai.chunxue@zs-hospital.sh.cn](mailto:bai.chunxue@zs-hospital.sh.cn)

Jun She, M.D., Ph.D.

Department of Pulmonary Medicine, Zhongshan Hospital, Fudan University,  
Shanghai, China; Shanghai Respiratory Research Institute, Shanghai, China;

No.180, Fenglin Road, Xuhui District, Shanghai, 200032, People's Republic of China

E-mail: [shejuncn@aliyun.com](mailto:shejuncn@aliyun.com)

# These authors share co-first authorship.

Running Title: Bone marrow-derived mesenchymal stem cells enhance autophagy to  
reduce the severity of acute lung injury

## **Supplementary Materials and Methods**

### **Cell labelling**

BM-MSCs were labelled using a PKH26 Fluorescent Cell Linker Kit (Sigma) according to the manufacturer's instructions, resuspended in PBS at a density of  $5 \times 10^6$  cells/ ml and then kept on ice prior to transplantation.

## **Supplementary figure legends**

Figure 1.

Engraftment of BM-MSCs in lung tissues. Engrafted BM-MSCs stained with PKH26 (red) were detected three and a half hours after cell injection. The samples were stained using 6-diamino-2-phenylindole (DAPI) (blue).
